# Supplementary material for: Lactobacillus helveticus-Fermented Milk Whey Suppresses Melanin Production by Inhibiting Tyrosinase through Decreasing MITF Expression
Source: PubMed Central journal article supplement (PMC7400678; doi:10.3390/nu12072082), 2020-07-14
Supplement: nutrients-12-02082-s001.pdf [file nutrients-12-02082-s001.pdf]

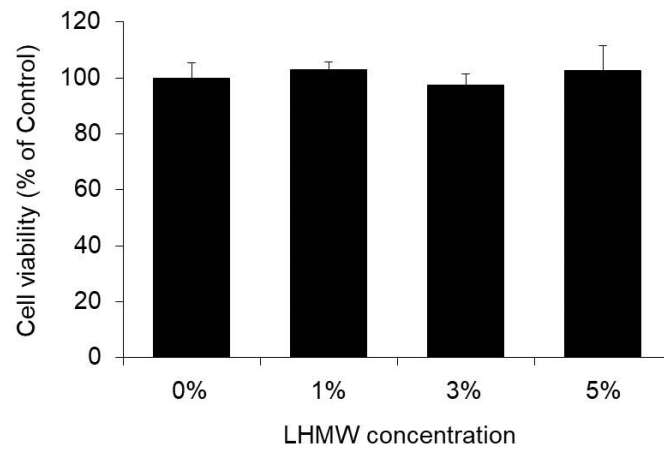

**Figure 1. Cell viability.** Cell viability was analyzed by the WST-1 assay, and the average value of the control was expressed as 100%.
